# Supplementary material
Source: PubMed Central journal article supplement (PMC10529271)
Supplement: NIHMS1922954-supplement-Supplementary_material.pdf [file NIHMS1922954-supplement-Supplementary_material.pdf]

1 **Supplementary Materials**

2

3 **A Bispecific Nanobody with High Sensitivity/Efficiency for**  
4 **Simultaneous Determination of Carbaryl and its Metabolite 1-**  
5 **Naphthol in the Soil and Rice Samples**

6

7 Min-Ling Liu<sup>a,1</sup>, Zi-Jian Chen<sup>a,b,1</sup>, Xiao-Qing Huang<sup>c</sup>, Hong Wang<sup>a</sup>, Jin-Li Zhao<sup>c</sup>, Yu-Dong  
8 Shen<sup>a</sup>, Lin Luo<sup>a</sup>, Xiao-Wei Wen<sup>a</sup>, Bruce Hammock<sup>d</sup>, Zhen-Lin Xu<sup>a,\*</sup>

9

10 <sup>a</sup>*Guangdong Provincial Key Laboratory of Food Quality and Safety / Research Center for Green*  
11 *Development of Agriculture, South China Agricultural University, Guangzhou 510642, China.*

12 <sup>b</sup>*Laboratory of Quality & Safety Risk Assessment for Agro-products (Zhaoqing), Ministry of*  
13 *Agriculture and Rural Affairs, School of Food and Pharmaceutical Engineering, Zhaoqing*  
14 *University, Zhaoqing, 526061, China*

15 <sup>c</sup>*Guangzhou Institute of Food Inspection, Guangzhou 510410, China.*

16 <sup>d</sup>Department of Entomology and UCD Comprehensive Cancer Center, University of California,  
17 Davis, California 95616, United States

18

19 \*Corresponding author: [jallent@163.com](mailto:jallent@163.com)

20 <sup>1</sup>These authors contributed equally to this work

## 21 **1. Materials and Instruments**

22 Carbaryl and its metabolites, 1-naphthol, were obtained from Energy Chemical Co. Ltd.  
23 (Shanghai, China). The high-specificity carbaryl-VHH plasmid without any crossover rate was  
24 kindly presented by China Agricultural University (He et al., 2019). The high-specificity 1-  
25 naphthol-VHH plasmid without any crossover rate was prepared in the early experiment of our  
26 laboratory (Chen et al., 2022). Bovine serum albumin (BSA) was purchased from Merck Co. Ltd.  
27 (Shanghai, China). The *E. coli* DH5a and *E. coli* BL21 (DE3) was purchased from TransGen  
28 Biotech Co. Ltd. (Beijing, China). The *Sfi*I restriction enzymes and T<sub>4</sub> DNA ligase were supplied  
29 by Thermo Fisher (Shanghai, China). 3,3',5,5'-tetramethylbenzidine (TMB) was supplied by  
30 Aladdin Chemical Technology Co., Ltd. (Shanghai, China). The DNA double strands and  
31 recombinant plasmid were amplified and constructed using a PCR instrument (TOne 96G,  
32 Biometra GmbH, Germany). The results of amplification were verified by a Nucleic acid  
33 electrophoresis apparatus (JY600C, Beijing). High-speed centrifugation (SORVALL LYNX  
34 4000) and ultraviolet-visible spectrum (NanoDrop 2000C) were purchased from Thermo Fisher  
35 (Shanghai, China). The ELISA plates were washed in a Wellwash™ microplate washer (HBS-  
36 4009, DeTie, Nanjing, China).

## 37 **2. Expression and purification of BsNb**

38 To express the target protein, we used chemically competent cells BL21 (DE3) that were  
39 transformed with the recombinant plasmid. The transformation was achieved through a heat  
40 shock at 42 °C for 90 seconds, followed by overnight incubation on LB plates at 37 °C.  
41 Subsequently, we selected positive clones for sequence identification. The clone with the correct

42 sequence was then induced to express the protein. It was cultured in LB medium supplemented  
43 with 100 µg/mL ampicillin at 37 °C until reaching an OD<sub>600</sub> value of approximately 0.4-0.8. At  
44 this point, we added 1 mmol/L of IPTG to initiate protein expression. The bacterial culture was  
45 incubated overnight at 37 °C with shaking at 250 rpm. To harvest the protein, the bacteria were  
46 pelleted by centrifugation at 13,523 g for 20 minutes at 4 °C. The fusion protein was extracted  
47 from the cell periplasmic fraction using the cold osmotic shock method. Subsequently,  
48 purification was performed using Ni-NTA resin. The purification process involved eluting  
49 different impurities with PBS (40 mL), followed by elution with 10 mM imidazole (40 mL) and  
50 20 mM imidazole (20 mL), respectively. The target protein was then obtained by eluting with  
51 200 mmol/L imidazole in 0.01 mol/L PBS. After purification, the protein was dialyzed against  
52 0.01 mol/L PBS and stored at -20 °C for further use.

### 53 **3. Development of anti-carbaryl and anti-1-naphthol ELISA**

54 To prepare the enzyme plate for the assay, the coating hapten carbaryl-BSA/1-naphthol-  
55 BSA was diluted with coating fluid to a concentration of 1 µg/mL. A volume of 100 µL per well  
56 was added to the enzyme plate, followed by incubation at 37 °C for 12 hours. The plate was then  
57 covered with blocking fluid and incubated at 37 °C for an additional 3 hours. After drying at  
58 37 °C for 1 hour, the plate was ready for use.

59 The first step involved testing the antigen binding activity of C-N-VHH and N-C-VHH.  
60 BsNbs, including C-N-VHH and N-C-VHH, were prepared at a range of concentrations using a  
61 two-fold dilution method. The initial concentration of BsNbs was 1 µg/mL. Following the  
62 addition of BsNbs to the plate and a 30-minute incubation at 37 °C, 100 µL of rabbit anti-VHH

63 [HRP] (diluted at 1:5000) was added and incubated for another 30 minutes at 37 °C.  
64 Subsequently, 100 µL of TMB substrate was added to the plate, and the culture was placed in a  
65 constant temperature water bath at 37 °C for 10 minutes. The reaction was stopped by adding 50  
66 µL of stop solution (10% H<sub>2</sub>SO<sub>4</sub>) per well. The absorbance values at A450 nm were then  
67 measured using an enzyme-labeled Analyzer.

68 For the ic-ELISA, the initial concentrations of carbaryl and 1-naphthol were set at 10 µg/mL,  
69 and the procedure was identical to the one described above. Following the assay, calibration  
70 curves were fitted using Origin 2022 software, with A450 nm as the ordinate and the logarithm  
71 of the drug concentration as the abscissa. Finally, the obtained IC<sub>50</sub> values of BsNbs were  
72 compared.

#### 73 **4. Sample preparation and recovery test**

74 For soil sample preparation, the impurities of 10.0 g soil in farmland were removed and  
75 sieved through 100-mesh screen. Rice sample (20.0 g) was prepared through crushing and ultra-  
76 centrifugating. Then all samples were shaken (soil sample: 260 rpm, 25 °C, 30 min by shaking  
77 table; rice sample: 2 min each time, 3 times by homogenate machine), extracted by 80 mL of 70%  
78 methanol (water to extract carbaryl and methanol to extract 1-naphthol) and filtered with a 0.45  
79 µm filter paper. After fully air (carbaryl)/nitrogen (1-naphthol) drying, corresponding blank  
80 samples matrix solution were obtained. Subsequently, the sample matrix influence was detected  
81 by diluting the solutions with 0.01M PBS solution at various ratios (5, 10, 20, 40 times). For the  
82 recovery test, different concentrations of carbaryl and 1-naphthol (0.02 mg/kg, 0.10 mg/kg, 0.50  
83 mg/kg, 2.50 mg/kg) were added to soil or rice samples. After thorough mixing and shaking, the

84 sample solutions were subjected to the sample pretreatment method specified for testing.  
85 Detection was then performed to analyze the samples.

86 To verify the accuracy and reliability of the proposed ELISA method, LC-MS/MS (Liquid  
87 Chromatography-Tandem Mass Spectrometry) was employed as a reference method. The  
88 chromatography process was conducted according to the specific conditions outlined in Table  
89 S2, adhering to the Chinese national standards.

90

## 91 **References**

92 He, J., Tao, X., Wang, K., Ding, G., Li, J., Li, Q., Gee, S.J., Hammock, B.D., Xu, T. 2019. One-  
93 step immunoassay for the insecticide carbaryl using a chicken single-chain variable  
94 fragment (scFv) fused to alkaline phosphatase. *Anal. Biochem.* 572, 9-15.  
95 <https://doi.org/10.1016/j.ab.2019.02.022>.

96 Chen, Z., Wu, H., Shen, Y., Wang, H., Zhang, Y., Hammock, B.D., Li, Z., Luo, L., Lei, H., Xu,  
97 Z. 2022. Phosphate-triggered ratiometric fluoroimmunoassay based on nanobody-alkaline  
98 phosphatase fusion for sensitive detection of 1-naphthol for the exposure assessment of  
99 pesticide carbaryl. *J. Hazard. Mater.* 424(Pt C), 127411.  
100 <https://doi.org/10.1016/j.jhazmat.2021.127411>.

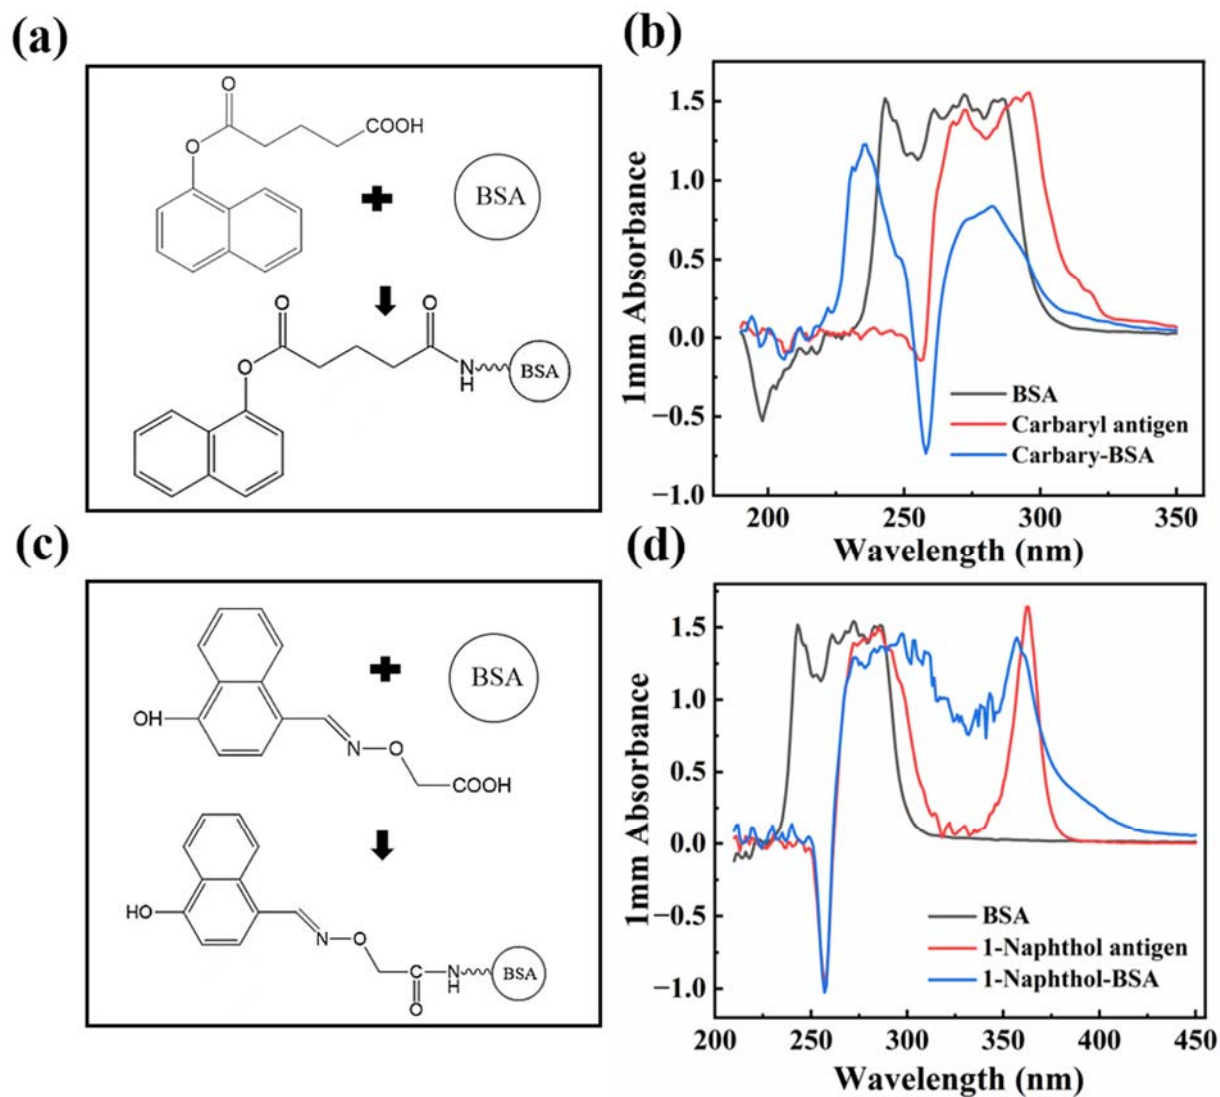

101  
 102 **Figure S1.** Coating antigen of carbaryl and 1-naphthol. (a) Antigen structure of carbaryl and  
 103 coating hapten; (b) The UV wavelength of carbaryl antigen and coating hapten; (c) 1-naphthol  
 104 complete antigen and coating hapten; (d) The UV wavelength of 1-naphthol antigen and coating  
 105 hapten.

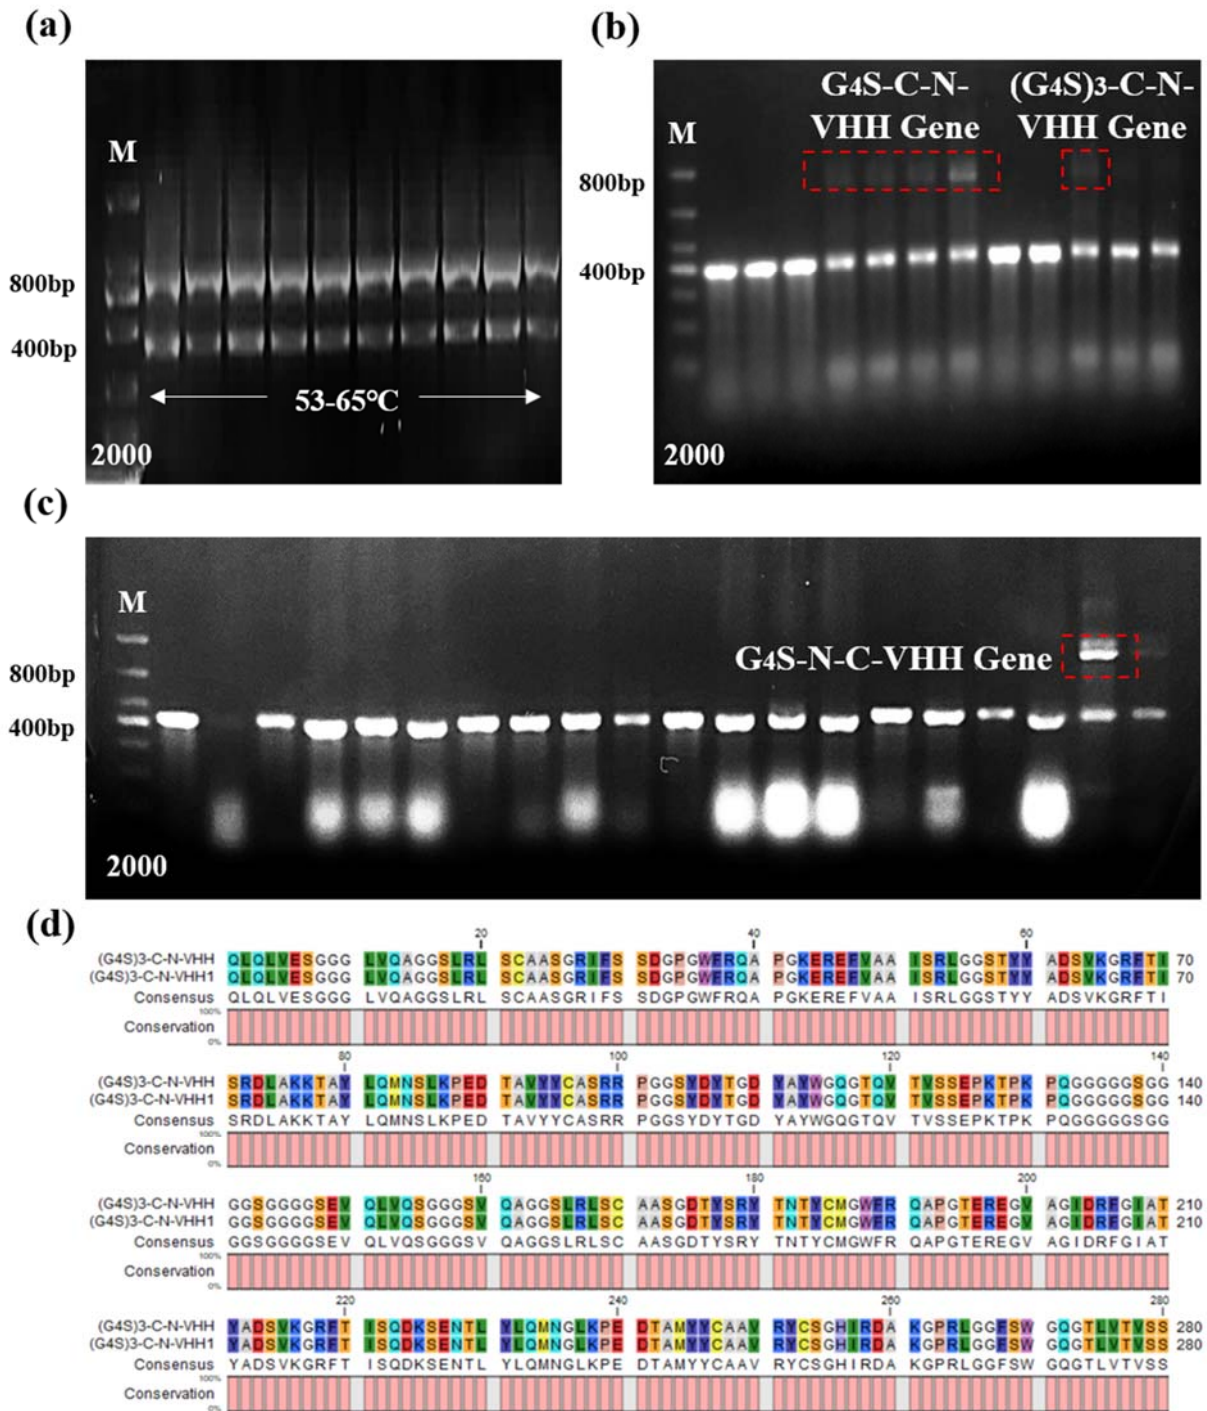

106  
 107 **Figure S2.** Verification of target vector construction. (a) The verification results of the PCR  
 108 reaction at different annealing temperatures; (b) Colony PCR nucleic acid electrophoresis  
 109 verification results (C-N-VHH); (c) Colony PCR nucleic acid electrophoresis verification results  
 110 (N-C-VHH); (d) Sequencing results of (G<sub>4</sub>S)<sub>3</sub>-C-N-VHH.



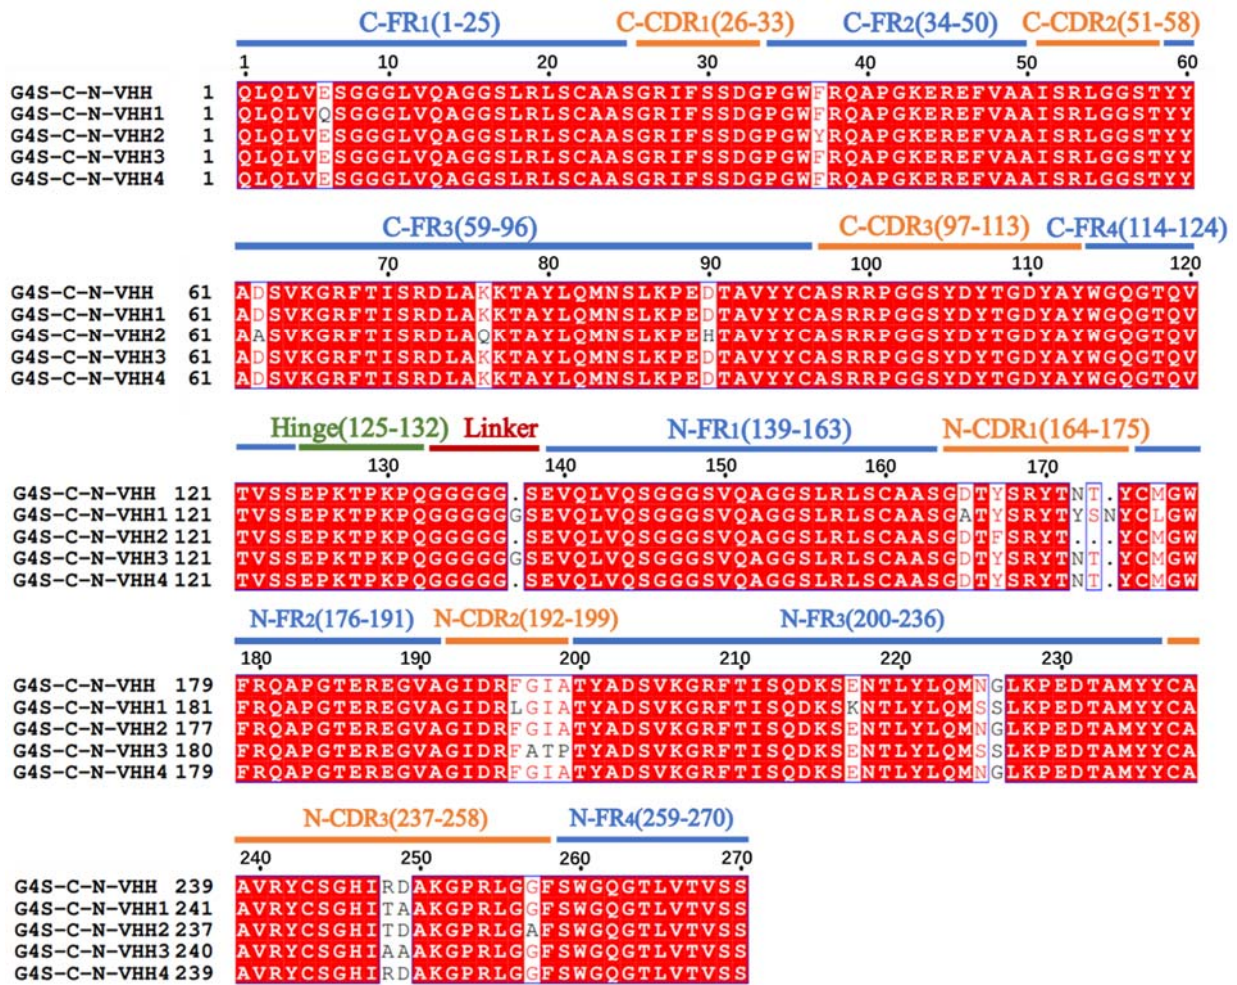

111

112 **Figure S3.** Sequence results of BsNbs (G4S-C-N-VHH1~4).



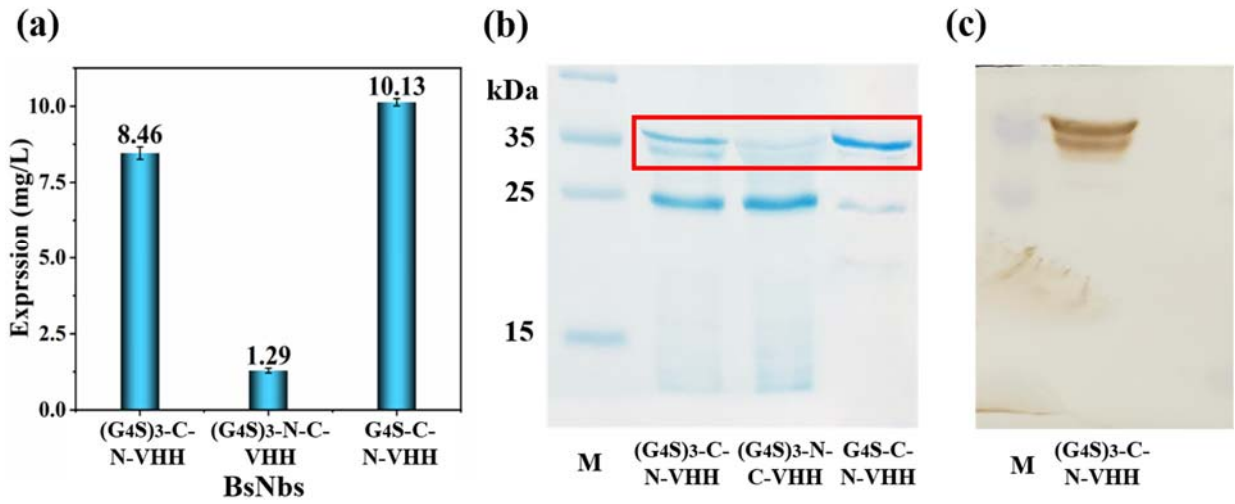

113  
114 **Figure S4.** The results of expression, SDS-PAGE and Western blot of BsNb. (a) Expression  
115 amount of BsNbs; (b) SDS-PAGE; (c) Western blot of (G4S)<sub>3</sub>-C-N-VHH.

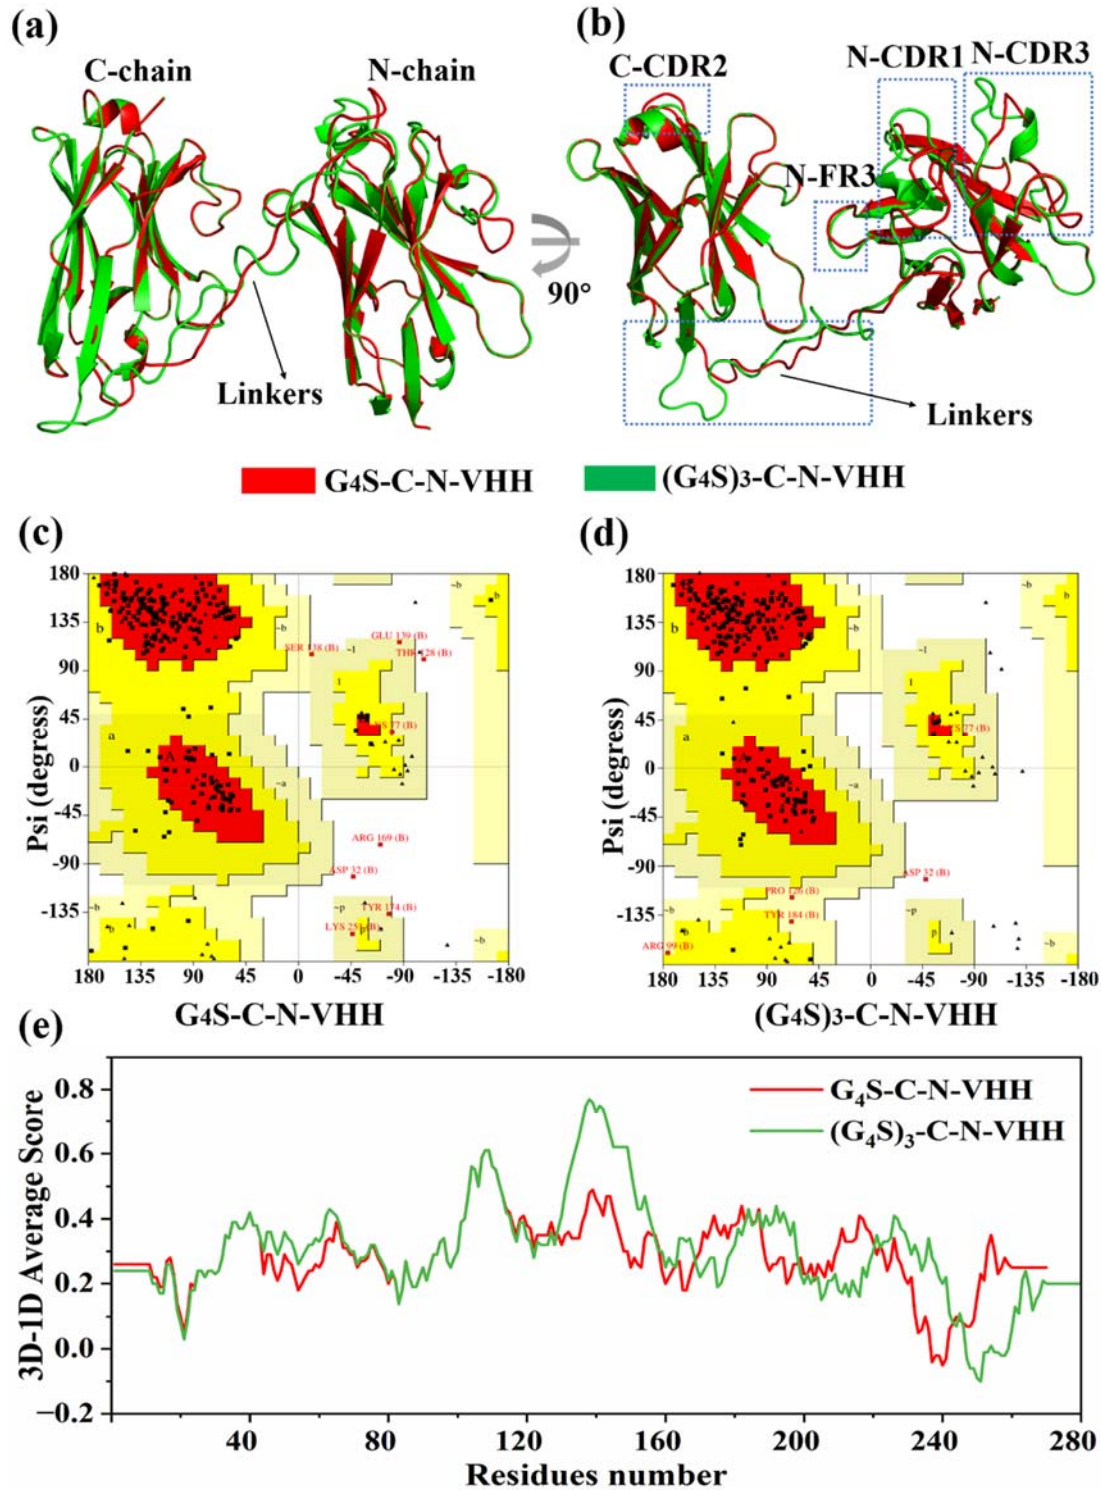

116  
 117 **Figure S5.** 3-D modeling and model evaluation of G<sub>4</sub>S-C-N-VHH and (G<sub>4</sub>S)<sub>3</sub>-C-N-VHH. (a-b)  
 118 The 3-D structure of G<sub>4</sub>S-C-N-VHH and (G<sub>4</sub>S)<sub>3</sub>-C-N-VHH; (c-d) Ramachandran map of G<sub>4</sub>S-  
 119 C-N-VHH and (G<sub>4</sub>S)<sub>3</sub>-C-N-VHH; (e) The 3D-1D averaged score of G<sub>4</sub>S-C-N-VHH and (G<sub>4</sub>S)<sub>3</sub>-  
 120 C-N-VHH.

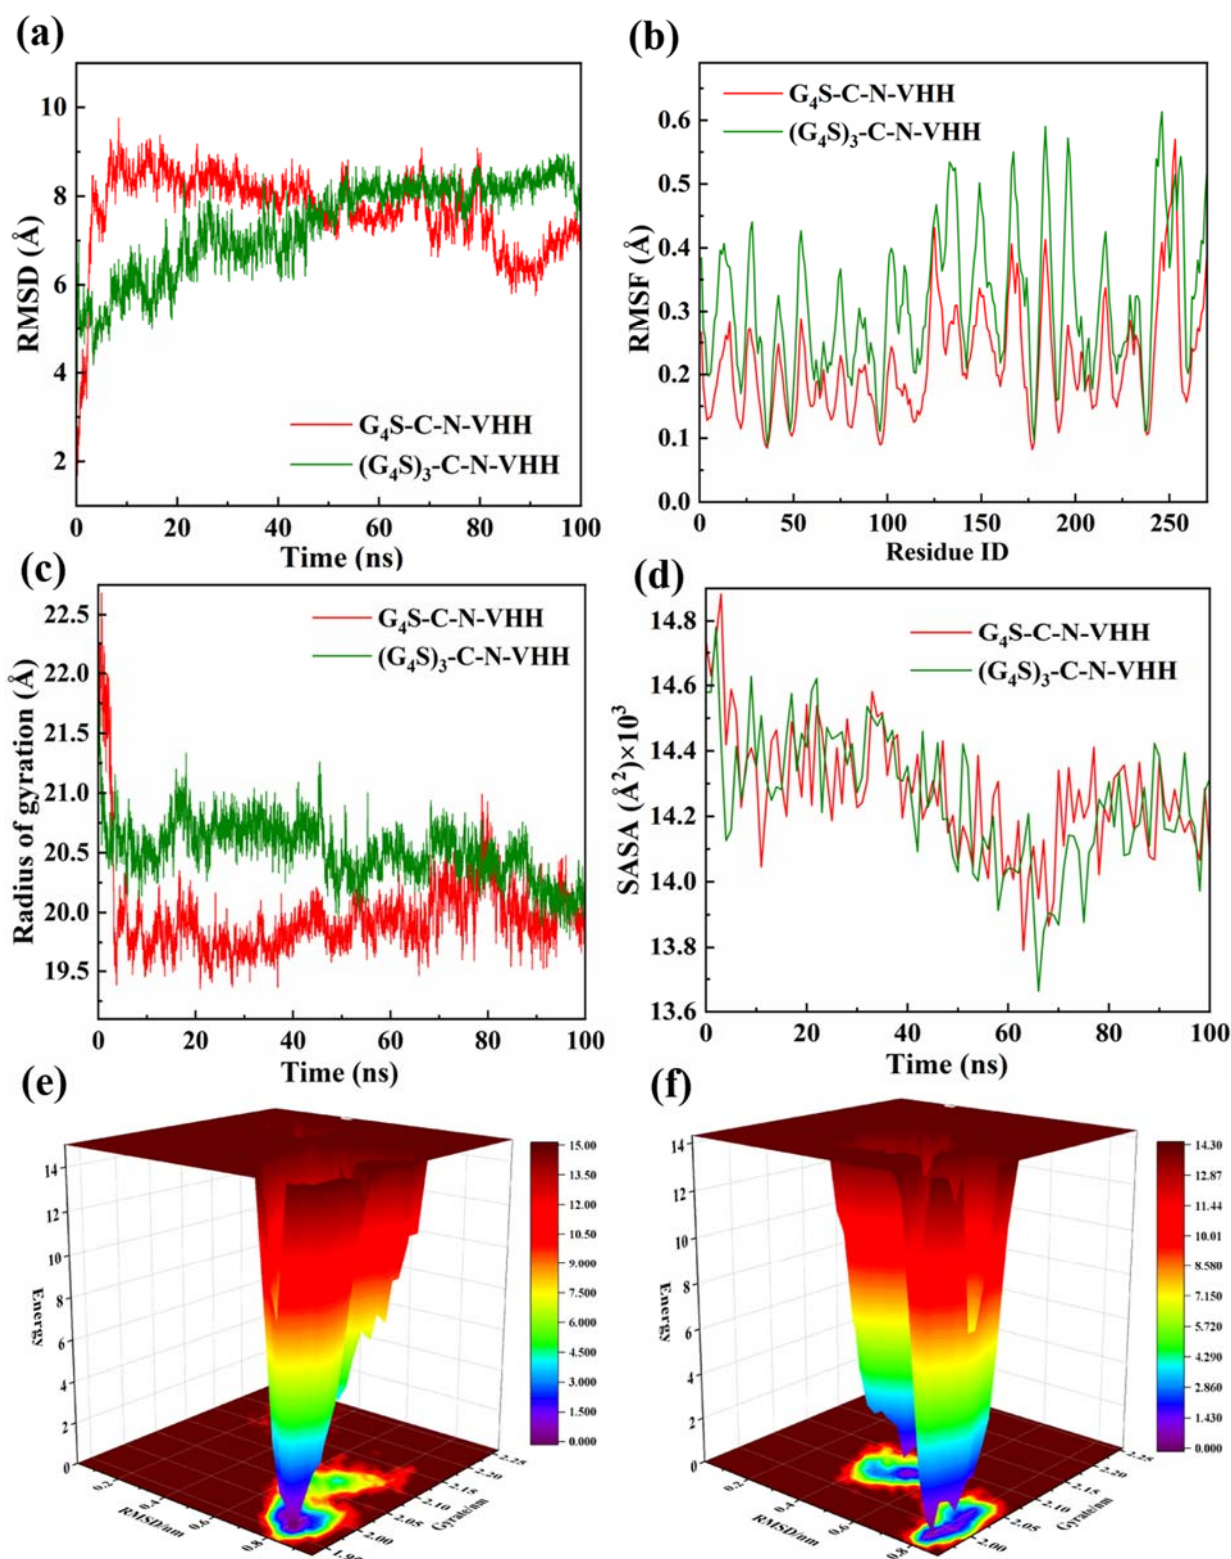

121  
 122 **Figure S6.** Results of molecular dynamics. (a) Root-mean-square deviation (RMSD); (b) Root-  
 123 mean-square fluctuation (RMSF); (c) Radius of gyration; (d) Solvent accessible surface area  
 124 (SASA) in the simulation process; (e-f) The Free Energy Landscapes.



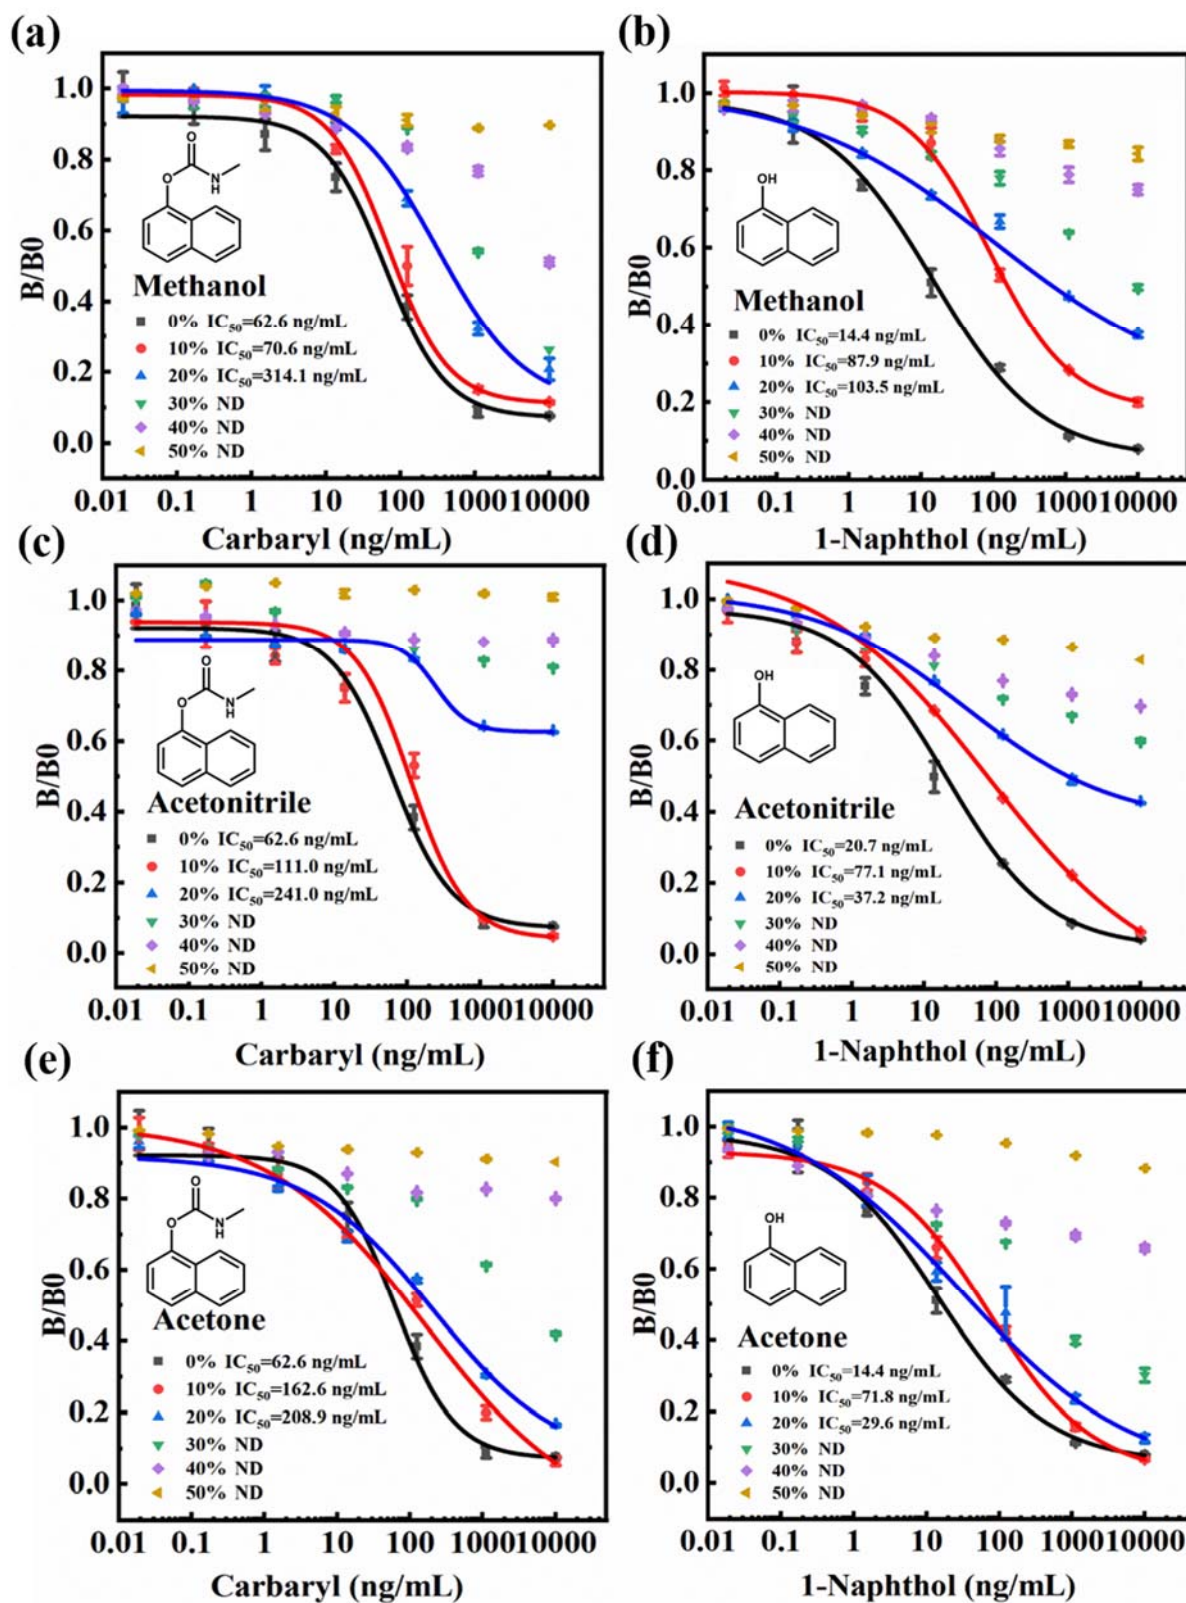

125  
 126 **Figure S7.** Effects of different organic reagents on BsNb characteristics. (a, c, e) Different  
 127 concentrations of methanol/acetonitrile/acetone to carbaryl; (b, d, f) Different concentrations  
 128 of methanol/acetonitrile/acetone to 1-naphthol.

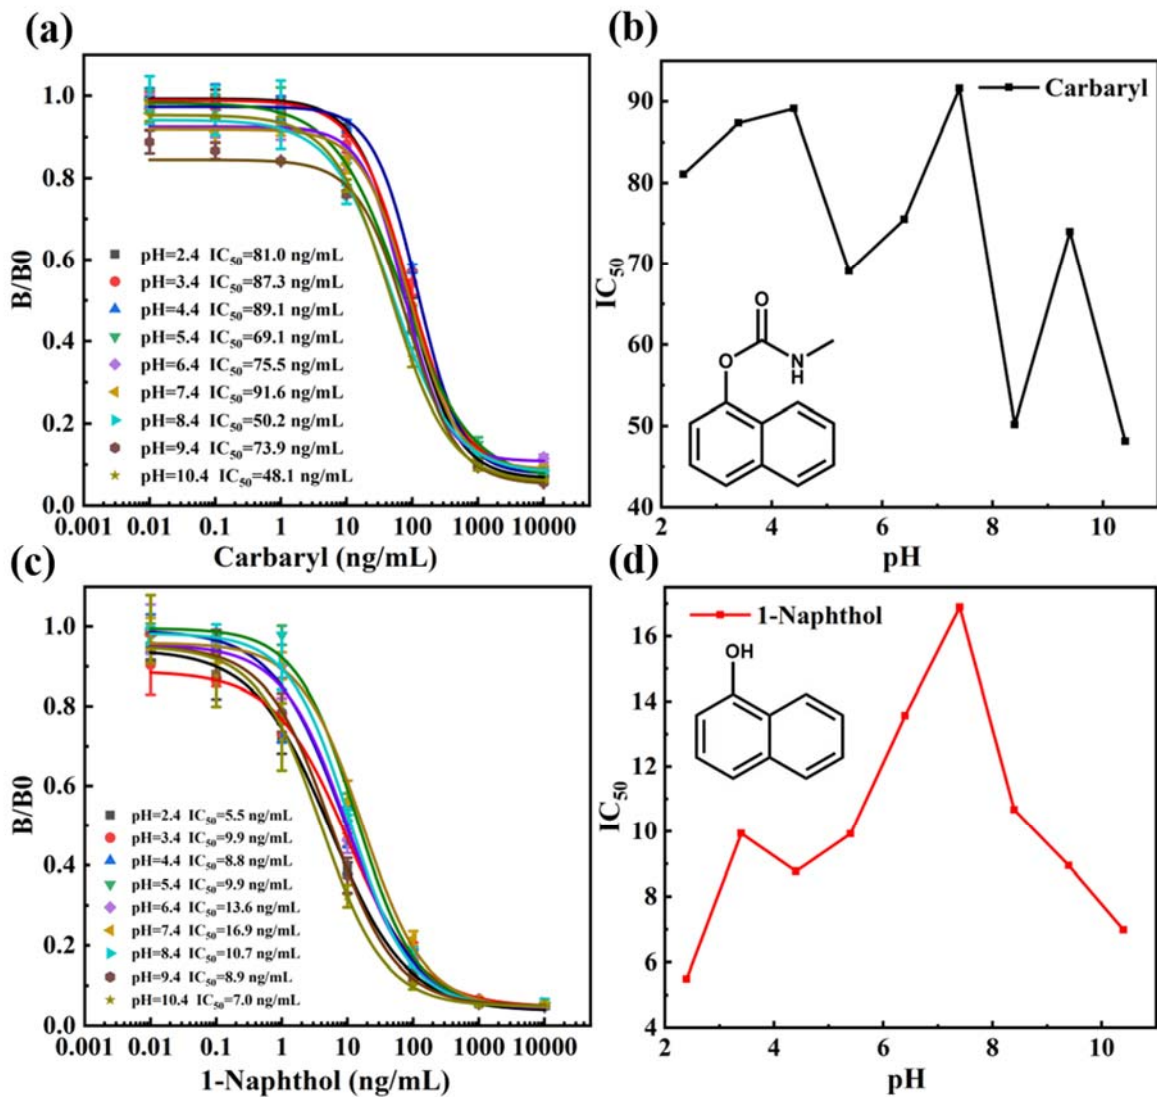

129

130 **Figure S8.** Effects of different pH values to carbaryl (a-b) and to 1-naphthol (c-d).

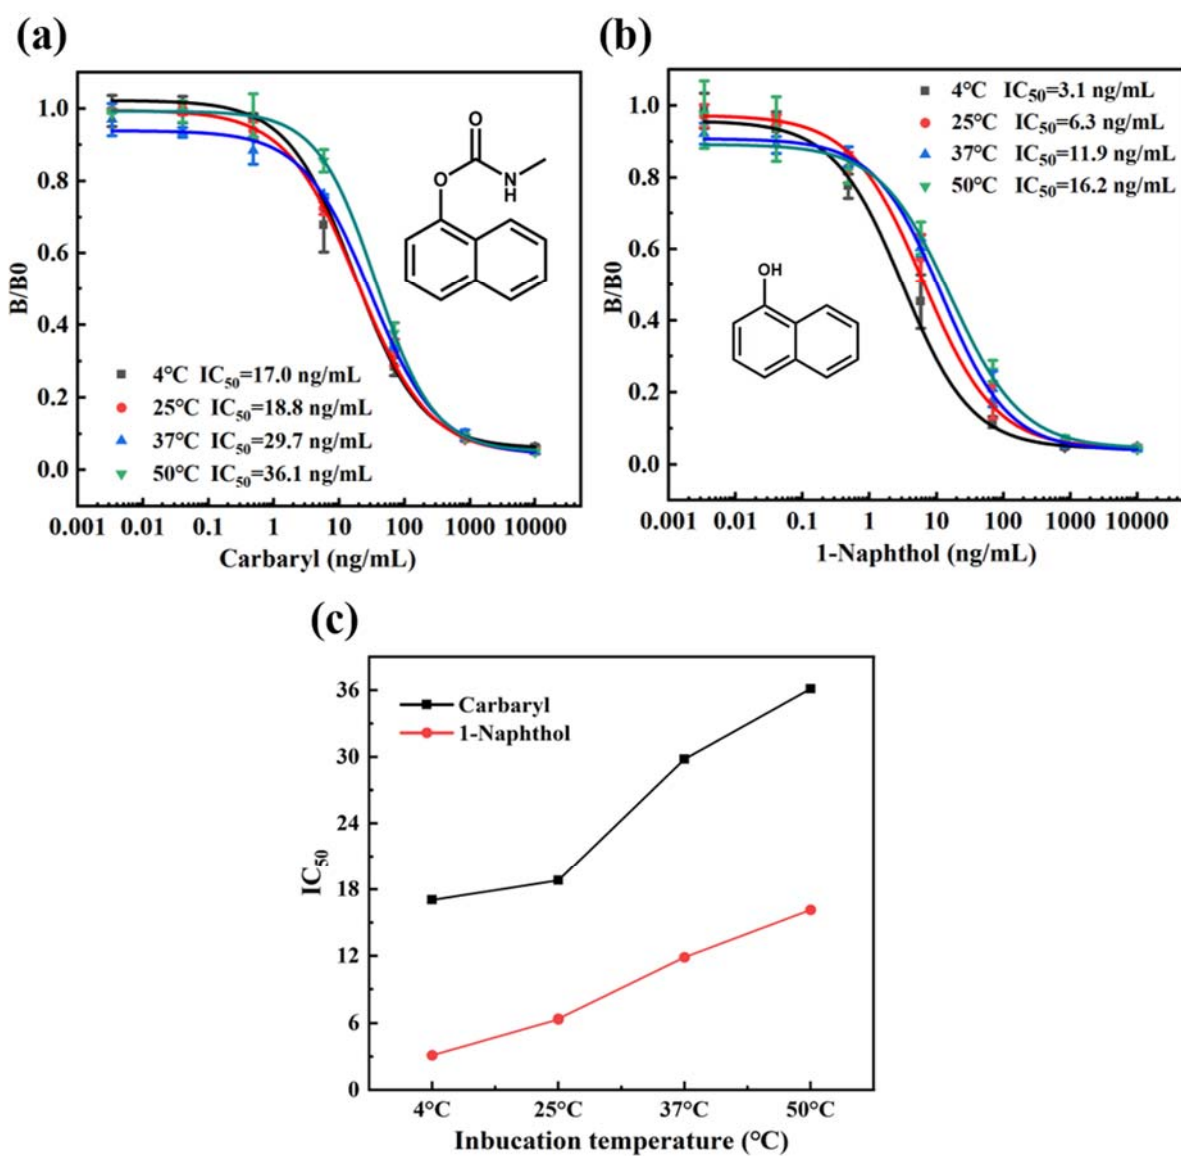

131  
 132 **Figure S9.** Effect of incubated temperature on the sensitivity of BsNb via ELISA. (a) Effect on  
 133 BsNb to carbaryl; (b) Effect on BsNb to 1-naphthol; (c) Variation of  $IC_{50}$  at different incubation  
 134 temperatures.

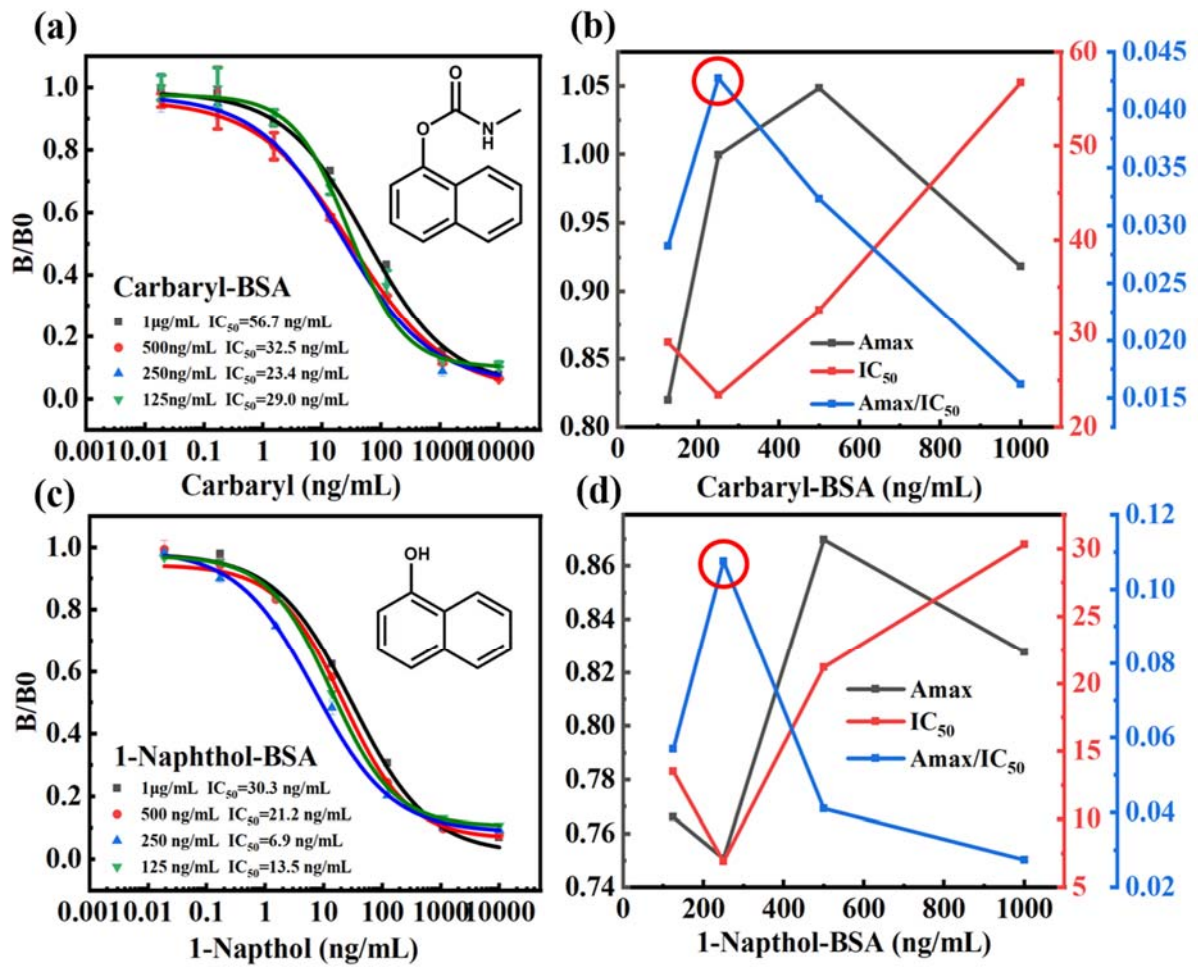

135  
 136 **Figure S10.** Effects of different concentrations of coating haptens to BsNb against carbaryl (a-b)  
 137 and 1-naphthol (c-d).



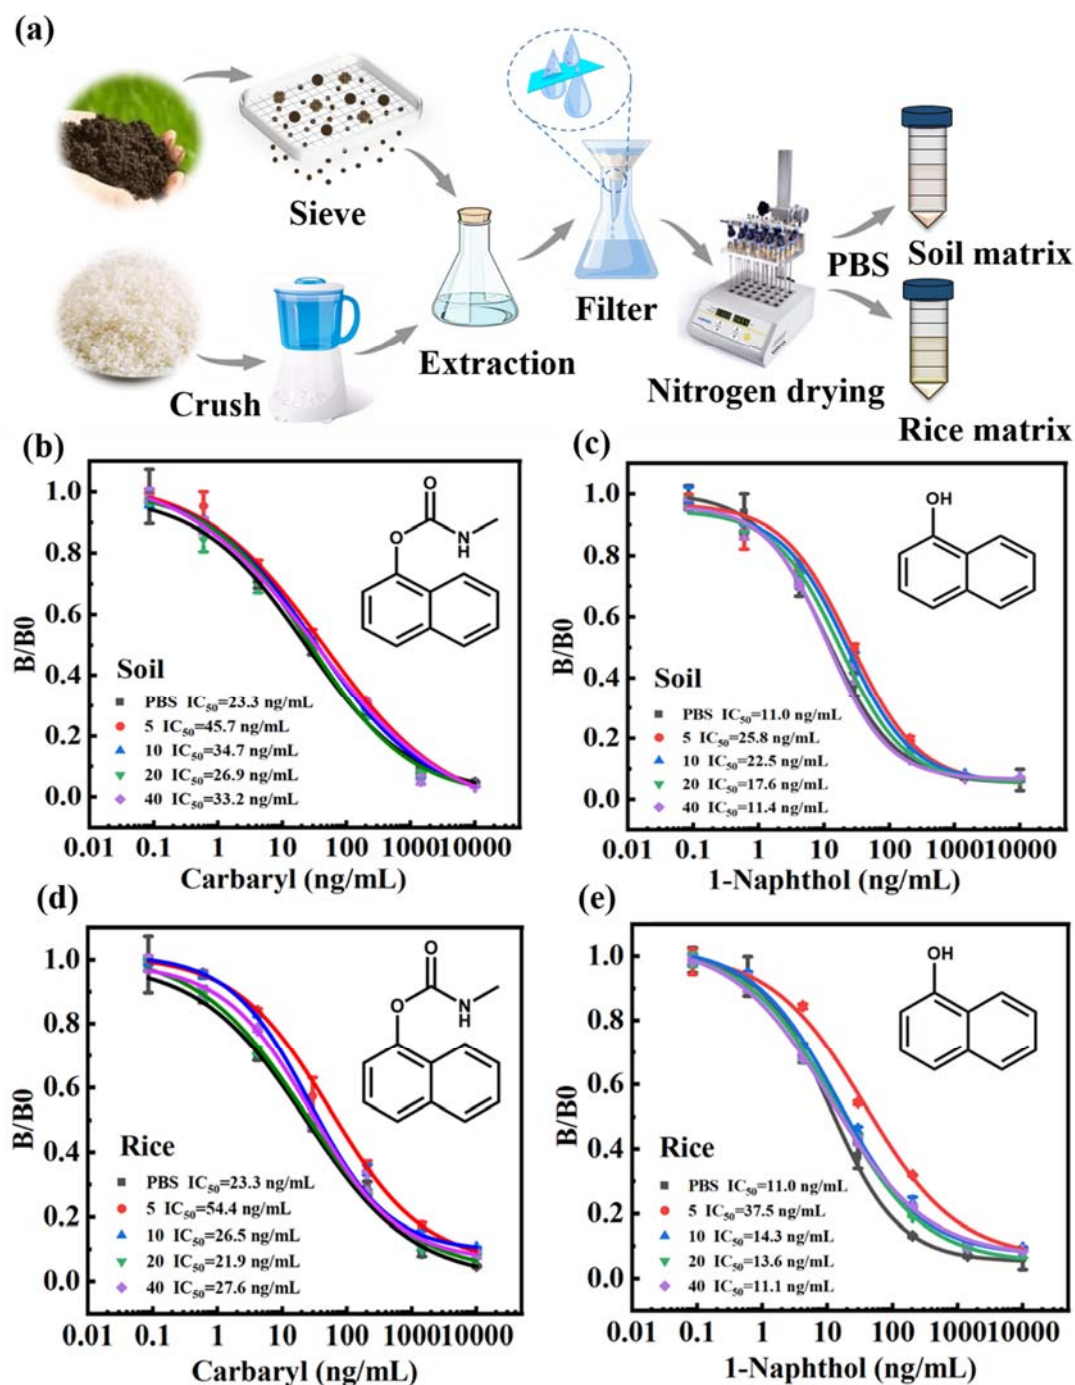

138  
 139 **Figure S11.** Calibration curves of ic-ELISA based on buffers and blank sample extract with  
 140 several-fold dilution buffer solutions. (a) The procedures of samples preparation; (b-c) matrix  
 141 effect with soil extraction at 1:5, 1:10, 1:20 and 1:40 dilutions for carbaryl and 1-naphthol  
 142 analysis; (d-e) matrix effect with rice extraction at 1:5, 1:10, 1:20 and 1:40 dilutions for carbaryl  
 143 and 1-naphthol analysis.

144 **Table S1.** Forward (F)/ Reverse (R) primer sequences of (G<sub>4</sub>S)<sub>n</sub>-C-N-VHH and (G<sub>4</sub>S)<sub>3</sub>-N-C-VHH.

| BsNbs   | Primer                                  | Base Sequence                                                             |
|---------|-----------------------------------------|---------------------------------------------------------------------------|
|         | C-N-F1                                  | CCGTGGCCCAGGCGGCCAGTTGCAGCTCGTGGAG                                        |
|         | C-N-R1                                  | CCCAGACTGCACCAGCTGCACCTCGCCTTGTGGTTTTGGTGT                                |
|         | C-N-F2                                  | CCCAAGACACCAAAACCACAAGGCGAGGTGCAGCTGGTGCAG                                |
|         | G <sub>4</sub> S-C-N-R1                 | AGAGCCGCCGCCACCGCCTTGTGGTTTTGGTGTCTT                                      |
|         | G <sub>4</sub> S-C-N-F2                 | GGTGGCGGCGGCTCTGAGGTGCAGCTGGTGCAGTCTGGGGGAGGCTCGGTG                       |
| C-N-VHH | (G <sub>4</sub> S) <sub>2</sub> -C-N-R1 | GCTTCCGCCTCCTCCAGAGCCACCACCACCGCCTTGTGGTTTTGG                             |
|         | (G <sub>4</sub> S) <sub>2</sub> -C-N-F2 | GGAGGAGGCGGAAGCGAGGTGCAGCTGGTGCAGTCTGGGGGAGGCTCGGTGCAG                    |
|         | (G <sub>4</sub> S) <sub>3</sub> -C-N-R1 | GCTTCCGCCTCCTCCAGAGCCACCACCACCGCCTTGTGGTTTTGGTGT                          |
|         | (G <sub>4</sub> S) <sub>3</sub> -C-N-F2 | GGAGGAGGCGGAAGCGGTGGCGGCGGCTCTGAGGTGCAGCTGGTGCAG                          |
|         | (G <sub>4</sub> S) <sub>4</sub> -C-N-R1 | AGAGCCGCCGCCACCGCTTCCGCCTCCTCCAGAGCCACCACCACCGCCTTGTGGTTTTGG              |
|         | (G <sub>4</sub> S) <sub>4</sub> -C-N-F2 | GGTGGCGGCGGCTCTGGTGGCGGCGGCTCTGAGGTGCAGCTGGTGCAGTCTGGGGGAGGC<br>TCGGTGCAG |
|         | C-N-R2                                  | CTGGCCGGCCTGGCCTGAGGAGACGGTGACCAG                                         |
| N-C-VHH | (G <sub>4</sub> S) <sub>3</sub> -N-C-F1 | CCGTGGCCCAGGCGGCCGAGGTGCAGCTGGTGCAG                                       |
|         | (G <sub>4</sub> S) <sub>3</sub> -N-C-R1 | AGAGCCGCCGCCACCTGAGGAGACGGTGACCAG                                         |
|         | (G <sub>4</sub> S) <sub>3</sub> -N-C-F2 | GGTGGCGGCGGCTCTCAGTTGCAGCTCGTGGAG                                         |
|         | (G <sub>4</sub> S) <sub>3</sub> -N-C-R2 | CTGGCCGGCCTGGCCGCCTTGTGGTTTTGGTGT                                         |

145 Linker: G<sub>4</sub>S—GGTGGCGGCGGCTCT;

146 (G<sub>4</sub>S)<sub>2</sub>—GGTGGTGGTGGCTCTGGAGGAGGCGGAAGC;

147 (G<sub>4</sub>S)<sub>3</sub>—GGTGGTGGTGGCTCTGGAGGAGGCGGAAGCGGTGGCGGCGGCTCT;

148 (G<sub>4</sub>S)<sub>4</sub>—GGTGGTGGTGGCTCTGGAGGAGGCGGAAGCGGTGGCGGCGGCTCTGGTGGCGGCGGCTCT.

149 **Table S2.** Identification of BsNb and optimization results of parameters.

| Parameters                                         | BsNb      |            |
|----------------------------------------------------|-----------|------------|
|                                                    | Carbaryl  | 1-Naphthol |
| Linker peptide                                     | G4S       |            |
| Linker mode                                        | C-N       |            |
| PCR annealing temperature                          | 53-65 °C  |            |
| Coating concentration (ng/mL)                      | 250       | 250        |
| Dilution of BsNb (ng/mL)                           | 250       | 250        |
| Reaction temperature (°C)                          | 4/25      | 4/25       |
| Thermal stability (°C)                             | 90        | 90         |
| Methanol tolerance (%)                             | 10        | 10         |
| Acetonitrile tolerance (%)                         | 20        | 20         |
| Acetone tolerance (%)                              | 10        | 10         |
| Acid-base tolerance (pH)                           | 5.4-10.4  | 2.4-10.4   |
| IC <sub>50</sub> (ng/g)                            | 18.8      | 6.3        |
| Limit of detection (IC <sub>10</sub> , ng/g)       | 0.8       | 0.4        |
| Linear response range (IC <sub>20-80</sub> , ng/g) | 2.1-270.9 | 1.1-112.0  |

151 **Table S3.** Parameters of LC-MS/MS (AB 4500).

| Items                        | Parameters                                                                                             |
|------------------------------|--------------------------------------------------------------------------------------------------------|
| methanol solution (A)        | 5 mmol/L ammonium formate and 0.1% formic acid (v/v)                                                   |
| water solution (B)           | 5 mmol/L ammonium formate and 0.1% formic acid (v/v)                                                   |
| Injector temperature         | 40 °C                                                                                                  |
| Injection volume             | 10 $\mu$ L                                                                                             |
| Thermo Accucore AQ Column    | 150 mm*2.1 mm, 2.6 $\mu$ m                                                                             |
| Flow rate                    | 0.3 mL/min                                                                                             |
| Gradient elution             | 0~0.5 min, 90% B~90% B; 0.5 ~ 21 min, 90% B~0% B;<br>21~22 min, 0% B ~ 0% B; 22 ~ 22.1 min, 0% B~90% B |
| MS conditions                | Electrospray ion source, positive ion mode                                                             |
| The parent ion               | 202.0/145.1 (carbaryl); 145.1/127.1 (1-naphthol)                                                       |
| The daughter ion             | 202.0/127.1 (carbaryl); 145.1/115.1 (1-naphthol)                                                       |
| The declustering voltage (V) | 54 V (carbaryl); 140 V (1-naphthol)                                                                    |
| The collision voltage (V)    | 15, 37V (carbaryl); 29, 35V (1-naphthol)                                                               |

153 **Table S4.** Recovery of carbaryl and 1-naphthol from real samples by ic-ELISA and HPLC-  
 154 MS/MS.

| Analytes     | Spiked                      |            | ic-ELISA                    |                   | HPLC-MS/MS                  |                  |
|--------------|-----------------------------|------------|-----------------------------|-------------------|-----------------------------|------------------|
|              | level                       | Samples    | $\bar{X} \pm SD$            | Recovery          | $\bar{X} \pm SD$            | Recovery         |
|              | [ $\mu\text{g}/\text{kg}$ ] |            | [ $\mu\text{g}/\text{kg}$ ] | $\pm CV$ (%)      | [ $\mu\text{g}/\text{kg}$ ] | $\pm CV$ (%)     |
| carbar<br>yl | 0                           | Soil/ Rice | -0.21 $\pm$ 0.1             | -                 | 0                           | 0                |
|              | 20                          | Soil       | 19.2 $\pm$ 2.0              | 96.3 $\pm$ 10.5%  | 12.5 $\pm$ 0.5              | 65.0 $\pm$ 4.0%  |
|              |                             | Rice       | 23.3 $\pm$ 3.1              | 112.7 $\pm$ 13.0% | 16.1 $\pm$ 1.4              | 80.0 $\pm$ 8.5%  |
|              | 100                         | Soil       | 81.2 $\pm$ 2.9              | 81.7 $\pm$ 3.6%   | 81.7 $\pm$ 1.8              | 82.0 $\pm$ 2.2%  |
|              |                             | Rice       | 77.1 $\pm$ 10.0             | 76.5 $\pm$ 13.0%  | 84.8 $\pm$ 2.3              | 85.0 $\pm$ 2.7%  |
|              | 500                         | Soil       | 439.6 $\pm$ 16.4            | 84.8 $\pm$ 3.81%  | 449.6 $\pm$ 19.8            | 90.0 $\pm$ 4.4%  |
|              |                             | Rice       | 400.4 $\pm$ 30.3            | 80.4 $\pm$ 7.44%  | 414.0 $\pm$ 10.0            | 82.0 $\pm$ 2.4%  |
|              | 2500                        | Soil       | 2210.4 $\pm$ 85.9           | 88.6 $\pm$ 3.89%  | 2373.3 $\pm$ 52.2           | 94.8 $\pm$ 2.2%  |
|              |                             | Rice       | 2059.8 $\pm$ 119.5          | 82.5 $\pm$ 5.82%  | 2484.7 $\pm$ 215.2          | 99.2 $\pm$ 8.7%  |
|              | 1-<br>napht<br>hol          | 0          | Soil/ Rice                  | -0.14 $\pm$ 0.2   | -                           | 0                |
| 20           |                             | Soil       | 22.4 $\pm$ 3.4              | 110.8 $\pm$ 12.5% | 12.1 $\pm$ 0.0              | 60.0 $\pm$ 0.3%  |
|              |                             | Rice       | 21.4 $\pm$ 2.2              | 102.2 $\pm$ 9.5%  | 14.7 $\pm$ 1.5              | 75.0 $\pm$ 10.2% |
| 100          |                             | Soil       | 77.4 $\pm$ 2.6              | 77.4 $\pm$ 2.6%   | 82.4 $\pm$ 1.5              | 82.0 $\pm$ 1.8%  |
|              |                             | Rice       | 78.7 $\pm$ 8.1              | 78.7 $\pm$ 8.1%   | 87.1 $\pm$ 8.4              | 87.0 $\pm$ 9.6%  |
| 500          |                             | Soil       | 398.2 $\pm$ 24.7            | 79.6 $\pm$ 6.3%   | 438.3 $\pm$ 15.0            | 88.0 $\pm$ 3.4%  |
|              |                             | Rice       | 411.0 $\pm$ 56.9            | 82.2 $\pm$ 13.9%  | 452.0 $\pm$ 41.6            | 90.0 $\pm$ 9.2%  |

|      |      |              |           |              |           |
|------|------|--------------|-----------|--------------|-----------|
| 2500 | Soil | 2043.3±87.8  | 81.7±4.3% | 2357.3±105.1 | 94.4±4.5% |
|      | Rice | 2124.6±197.0 | 85.0±9.3% | 2447.3±200.6 | 98.0±8.2% |

---

155  $\bar{X}$  : Average of measured value; SD: Standard Deviation; CV: Coefficient of Variation; ND:

156 No Data.
